# Supplementary material for: An Exon-Specific Small Nuclear U1 RNA (ExSpeU1) Improves Hepatic OTC Expression in a Splicing-Defective spf/ash Mouse Model of Ornithine Transcarbamylase Deficiency
Source: PubMed Central journal article supplement (PMC7699343; doi:10.3390/ijms21228735), 2020-11-19
Supplement: ijms-21-08735-s001.pdf [file ijms-21-08735-s001.pdf]

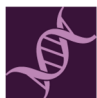

Supplementary

# An Exon-Specific Small Nuclear U1 RNA (ExSpeU1) Improves Hepatic OTC Expression in a Splicing-Defective *spf/ash* Mouse Model of Ornithine Transcarbamylase Deficiency

Dario Balestra <sup>1,\*</sup>, Mattia Ferrarese <sup>1</sup>, Silvia Lombardi <sup>1</sup>, Nicole Ziliotto <sup>1,4</sup>, Alessio Branchini <sup>1</sup>, Naomi Petersen <sup>2</sup>, Piter Bosma <sup>2,3</sup>, Mirko Pinotti <sup>1</sup> and Stan F.J. van de Graaf <sup>2,3</sup>

<sup>1</sup> Department of Life Sciences and Biotechnology and LTTA, University of Ferrara, 44121 Ferrara, Italy; frmtt1@unife.it (M.F.); lmbslv@unife.it (S.L.); zltnc1@unife.it (N.Z.); brnlss@unife.it (A.B.); pnm@unife.it (M.P.)

<sup>2</sup> Tytgat Institute for Liver and Intestinal Research and Department of Gastroenterology and Hepatology, Amsterdam UMC, University of Amsterdam, 1105 AZ Amsterdam, The Netherlands; n.petersen@amc.uva.nl (N.P.); p.j.bosma@amsterdamumc.nl (P.B.); k.f.vandegraaf@amsterdamumc.nl (S.F.J.v.d.G.)

<sup>3</sup> Amsterdam Gastroenterology Endocrinology Metabolism, Amsterdam UMC, 1105 AZ Amsterdam, The Netherlands

<sup>4</sup> School of Medicine and Surgery, University of Milano-Bicocca, 20900 Milan, Italy; nicole.ziliotto@unimib.it

\* Correspondence: [blsdra@unife.it](mailto:blsdra@unife.it); Tel.: +39-0532-974485

Received: 23 September 2020; Accepted: 17 November 2020; Published: 19 November 2020

A

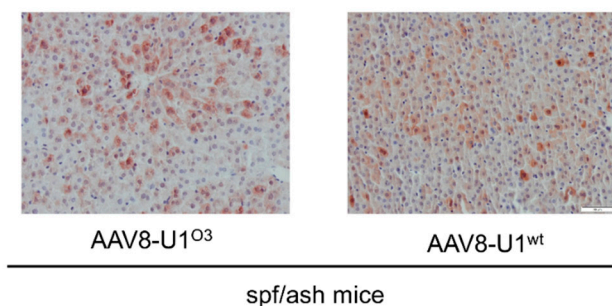

B

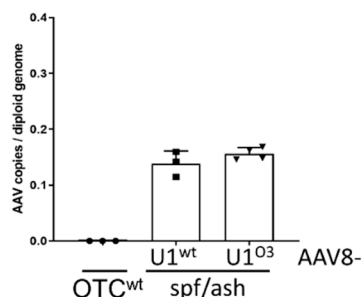

**Supplementary Figure S1.** (A) eGFP expression in livers of *spf/ash* mice injected with the AAV8-U1<sup>wt</sup> or AAV8-U1<sup>O3</sup>. Representative examples of liver sections for both animal models are shown. Images are taken at 20× magnification. Scale bar, 50 μm. (B) eGFP gene copy number in liver expressed as AAV copies per diploid mouse genome.

Supplementary Table S1. Sequences of oligonucleotides.

| Creation of mouse OTC minigene                             |         |                                                         |
|------------------------------------------------------------|---------|---------------------------------------------------------|
| <b>4F</b>                                                  | forward | ttaa <u>ac</u> catatgctgtgtaacctggaagctctatgat          |
| <b>4R</b>                                                  | reverse | ttaa <u>ac</u> catatgccttcaacattgccttgttatttc           |
| Mutant mouse OTC minigene                                  |         |                                                         |
| <b>OTC mut F</b>                                           | forward | ctcacagacaccgctcagtttgtaaaacttttc                       |
| <b>OTC mut R</b>                                           | reverse | gaaaagttttacaaactgagcgggtgctgtgag                       |
| Engineered U1snRNA variants for mouse OTC 5'ss             |         |                                                         |
| <b>U1<sup>0</sup> F</b>                                    | forward | aggcccaagatctgat <b>ACAAACCG</b> Agcaggggagataccat      |
| <b>U1<sup>01</sup> F</b>                                   | forward | aggcccaagatctgat <b>TTTACAAAC</b> Gcaggggagataccat      |
| <b>U1<sup>02</sup> F</b>                                   | forward | aggcccaagatctgat <b>AAGTTTTAC</b> Gcaggggagataccatgatca |
| <b>U1<sup>03</sup> F</b>                                   | forward | aggcccaagatctgat <b>AGAAAAGTT</b> Gcaggggagataccatgatca |
| Engineered U7snRNA variant for mouse OTC 5'ss              |         |                                                         |
| <b>U7<sup>0</sup></b>                                      | forward | acagaggccttccgacttttaactaacccatcagagaattttggag          |
| Plasmid-specific primers used to analyze splicing pattern  |         |                                                         |
| <b>alfa</b>                                                | forward | caactcaagctcctaagccactgc                                |
| <b>bra</b>                                                 | reverse | taggatccggtcaccaggaagttggtaaataca                       |
| Primers used to assess in vivo splicing                    |         |                                                         |
| <b>mOTCex3</b>                                             | forward | aagaagtactcgaacaagactgtcc                               |
| Primers used to evaluate the correctly spliced transcripts |         |                                                         |
| <b>mOTCwtex4</b>                                           | reverse | catctgtcatgctagataagacacgag                             |
| Primers used to evaluate the titer of AAV vectors          |         |                                                         |
| <b>eGFP</b>                                                | forward | GCGGGGCAAGTGACCGTGTG                                    |
|                                                            | reverse | TGCGCAAACCCAGGGCTGCC                                    |
| Primers used to evaluate U1 expression                     |         |                                                         |
| <b>U1<sup>wt</sup>Ex</b>                                   | forward | agatctcactactacctg                                      |
| <b>U1<sup>03</sup>Ex</b>                                   | forward | agatctgatagaaaagtt                                      |
| <b>U1Ex</b>                                                | reverse | gaacgcagtccccactaccac                                   |
| Primers used to evaluate the AAV8 gene copy number         |         |                                                         |
| <b>GFP</b>                                                 | forward | catggctctgctggagttc                                     |
|                                                            | reverse | gtcaggtcagcttggcttctc                                   |

The NdeI restriction site is underlined; mutated nucleotides are in bold; the replaced 9 nucleotides of 5' tail of U1snRNA variants are indicated in upper case.
